# Supplementary material
Source: PubMed Central journal article supplement (PMC8616837)
Supplement: NIHMS1753343-supplement-1.pdf [file NIHMS1753343-supplement-1.pdf]

**Table S1. Frequency of deletions in testis, sperm and liver, Related to Figures 1, 2, 4 and S2**

| Strain background               | Tissue       | Hotspot pair  | Mouse and genotype                | No. haploid genomes | No. deletions | Frequency (10 <sup>-6</sup> )   |
|---------------------------------|--------------|---------------|-----------------------------------|---------------------|---------------|---------------------------------|
| B6                              | testis       | Chr1 adult    | 1794 <i>Atm</i> <sup>-/-</sup>    | 5400000             | 67            | 12.41                           |
|                                 |              |               | *1793 <i>Atm</i> <sup>+/+</sup>   | 5400000             | 0             | <0.19                           |
|                                 |              |               | *2018 <i>Atm</i> <sup>-/-</sup>   | 2066667             | 8             | 3.87                            |
|                                 |              |               | *2017 <i>Atm</i> <sup>+/-</sup>   | 2066667             | 0             | <0.48                           |
|                                 |              |               | *2066 <i>Atm</i> <sup>+/-</sup>   | 1600000             | 0             | <0.63                           |
|                                 |              |               | *2067 <i>Atm</i> <sup>+/+</sup>   | 2266668             | 0             | <0.44                           |
|                                 |              |               | *2656 <i>Atm</i> <sup>-/-</sup>   | 1400000             | 6             | 4.29                            |
|                                 |              |               | *2657 <i>Atm</i> <sup>+/-</sup>   | 3200000             | 0             | <0.31                           |
|                                 |              |               | *2732 <i>Atm</i> <sup>+/-</sup>   | 6400000             | 2             | 0.31                            |
|                                 |              |               | *2970 <i>Atm</i> <sup>+/-</sup>   | 2000000             | 0             | <0.50                           |
|                                 |              |               | *3162 <i>Atm</i> <sup>+/+</sup>   | 6400000             | 0             | <0.16                           |
|                                 |              |               | *3312 <i>Spo11</i> <sup>-/-</sup> | 6400000             | 0             | <0.16                           |
|                                 |              |               | *3345 <i>Spo11</i> <sup>-/-</sup> | 6400000             | 0             | <0.16                           |
|                                 |              |               | *3424 <i>Spo11</i> <sup>-/-</sup> | 1600000             | 1             | 0.63                            |
|                                 |              |               |                                   |                     |               | Total <i>Atm</i> <sup>-/-</sup> |
|                                 |              |               | Total <i>Atm</i> <sup>+/-</sup>   | 15266667            | 2             | 0.13                            |
|                                 |              |               | Total <i>Atm</i> <sup>+/+</sup>   | 14066668            | 0             | <0.071                          |
|                                 |              |               | Total <i>Spo11</i> <sup>-/-</sup> | 14400000            | 1             | 0.07                            |
| B6                              | testis       | Chr1 juvenile | *1 <i>Atm</i> <sup>-/-</sup>      | 3200000             | 24            | 7.50                            |
|                                 |              |               | *2 <i>Atm</i> <sup>+/-</sup>      | 3200000             | 0             | <0.31                           |
|                                 |              |               | *3 <i>Atm</i> <sup>+/+</sup>      | 3200000             | 0             | <0.31                           |
| B6                              | liver testis | Chr1 adult    | 3991 <i>Atm</i> <sup>-/-</sup>    | 10000000            | 0             | <0.10                           |
|                                 |              |               |                                   | 2400000             | 30            | 12.50                           |
| F1 B6/DBA                       | testis       | Chr1 adult    | 2654 <i>Atm</i> <sup>-/-</sup>    | 3600000             | 7             | 1.94                            |
|                                 |              |               | 2675 <i>Atm</i> <sup>-/-</sup>    | 5200000             | 30            | 5.77                            |
|                                 |              |               | 2674 <i>Atm</i> <sup>+/-</sup>    | 3200000             | 0             | <0.31                           |
|                                 |              |               | 2647 <i>Atm</i> <sup>+/+</sup>    | 3200000             | 0             | <0.31                           |
|                                 |              |               |                                   |                     |               | Total <i>Atm</i> <sup>-/-</sup> |
| B6                              | testis       | Chr19 adult   | *1793 <i>Atm</i> <sup>+/+</sup>   | 5400000             | 2             | 0.37                            |
|                                 |              |               | *2018 <i>Atm</i> <sup>-/-</sup>   | 266667              | 2             | 7.50                            |
|                                 |              |               | *2017 <i>Atm</i> <sup>+/-</sup>   | 400000              | 0             | <0.25                           |
|                                 |              |               | *2066 <i>Atm</i> <sup>+/-</sup>   | 1600000             | 0             | <0.63                           |
|                                 |              |               | *2067 <i>Atm</i> <sup>+/+</sup>   | 1866667             | 0             | <0.54                           |
|                                 |              |               | *2656 <i>Atm</i> <sup>-/-</sup>   | 3200000             | 7             | 2.19                            |
|                                 |              |               | *2657 <i>Atm</i> <sup>+/-</sup>   | 3200000             | 1             | 0.31                            |
|                                 |              |               | 2733 <i>Atm</i> <sup>-/-</sup>    | 4800000             | 29            | 6.04                            |
|                                 |              |               | *2732 <i>Atm</i> <sup>+/-</sup>   | 4800000             | 3             | 0.63                            |
|                                 |              |               | 2734 <i>Atm</i> <sup>-/-</sup>    | 400000              | 2             | 5.00                            |
|                                 |              |               | 2731 <i>Atm</i> <sup>+/-</sup>    | 400000              | 0             | <2.50                           |
|                                 |              |               | 2780 <i>Atm</i> <sup>-/-</sup>    | 400000              | 2             | 5.00                            |
|                                 |              |               | 2779 <i>Atm</i> <sup>+/-</sup>    | 400000              | 0             | <2.50                           |
| 2971 <i>Atm</i> <sup>-/-</sup>  | 2000000      | 5             | 2.50                              |                     |               |                                 |
| *2970 <i>Atm</i> <sup>+/-</sup> | 2000000      | 0             | <0.50                             |                     |               |                                 |
| *3162 <i>Atm</i> <sup>+/+</sup> | 6400000      | 0             | <0.16                             |                     |               |                                 |

|    |        |                   |                                  |          |    |        |
|----|--------|-------------------|----------------------------------|----------|----|--------|
|    |        |                   | *3312 <i>Spo11<sup>-/-</sup></i> | 6400000  | 0  | <0.16  |
|    |        |                   | *3345 <i>Spo11<sup>-/-</sup></i> | 6400000  | 0  | <0.16  |
|    |        |                   | *3424 <i>Spo11<sup>-/-</sup></i> | 1600000  | 0  | <0.63  |
|    |        |                   | Total <i>Atm<sup>-/-</sup></i>   | 11066667 | 47 | 4.25   |
|    |        |                   | Total <i>Atm<sup>+/-</sup></i>   | 12800000 | 4  | 0.31   |
|    |        |                   | Total <i>Atm<sup>+/+</sup></i>   | 13666667 | 2  | 0.15   |
|    |        |                   | Total <i>Spo11<sup>-/-</sup></i> | 14400000 | 0  | <0.069 |
| B6 | testis | Chr19<br>juvenile | *1 <i>Atm<sup>-/-</sup></i>      | 1600000  | 11 | 6.88   |
|    |        |                   | *2 <i>Atm<sup>+/-</sup></i>      | 3200000  | 0  | <0.31  |
|    |        |                   | *3 <i>Atm<sup>+/+</sup></i>      | 3200000  | 1  | 0.31   |
| B6 | sperm  | Chr19<br>adult    | 3776 <i>Atm<sup>+/-</sup></i>    | 6400000  | 7  | 1.09   |
|    |        |                   | 3834 <i>Atm<sup>+/+</sup></i>    | 3200000  | 0  | <0.31  |

Littermates are grouped. \* The same mice used for both hotspot pairs.

**Table S2. Deletions detected in *Atm*<sup>-/-</sup> with the analyses performed, Related to Figures 1, 2, 4, 5 and 6**

| Hotspot pair | Strain background (primer set) <sup>a</sup> | No. PCR reactions | DNA (ng) seeded in PCR | No. haploid genomes | Total No. deletions | No. deletions with insertions | No. deletions with mutations at junctions <sup>c</sup> | Analyses performed                                                                 |
|--------------|---------------------------------------------|-------------------|------------------------|---------------------|---------------------|-------------------------------|--------------------------------------------------------|------------------------------------------------------------------------------------|
| Chr1         | B6 (b6)                                     | 168               | 25                     | 1400000             | 16                  | 0                             | 2                                                      | frequency, breakpoint distribution, microhomology, insertions, recurring deletions |
|              |                                             | 640               | 50                     | 10666667            | 89                  | 12                            | 3                                                      | frequency, breakpoint distribution, microhomology, insertions, recurring deletions |
|              |                                             | 72                | 100                    | 2400000             | 29                  | 3                             | 0                                                      | breakpoint distribution, insertions, microhomology, recurring deletions            |
|              |                                             |                   |                        | Total Chr1 from B6  | 134                 | 15                            | 5                                                      |                                                                                    |
|              | B6 (b6/dba)                                 | 48                | 50                     | 640000              | 2                   | 1                             | 0                                                      | insertions, microhomology, recurring deletions                                     |
|              | B6/DBA (b6/dba)                             | 528               | 50                     | 8800000             | 37                  | 2                             | 0                                                      | frequency, breakpoint distribution, microhomology, insertions, recurring deletions |
|              | B6/DBA (b6)                                 | 144               | 50                     | 2400000             | 12                  | 1                             | 1                                                      | insertions, microhomology, recurring deletions                                     |
|              |                                             |                   | Total Chr1             | 185                 | 19                  | 6                             |                                                        |                                                                                    |
| Chr19        | B6                                          | 8                 | 10                     | 266667              | 1                   | 0                             | 0                                                      | breakpoint distribution, microhomology, insertions, recurring deletions            |
|              |                                             | 760               | 50                     | 12666667            | 58 <sup>b</sup>     | 8                             | 5                                                      | frequency, breakpoint distribution, microhomology, insertions, recurring deletions |
|              |                                             |                   |                        | Total Chr19         | 59 <sup>b</sup>     | 8                             | 5                                                      |                                                                                    |

<sup>a</sup> For the Chr1 hotspot pair, two different primer sets were used as indicated.

<sup>b</sup> For one deletion event, one breakpoint could not be precisely mapped.

<sup>c</sup> Deletions with short 1–3-bp non-templated insertions at the breakpoint junction and/or point mutations or indels up to 10 bp from breakpoint junctions.

**Table S3. Double cutting and deletion frequencies per meiosis in *Atm*<sup>-/-</sup>, Related to Figures 1, 2, S1 and S2**

| Hotspot pair                      |               | Hotspot strength (RPM) | No. DSBs per chromatid at hotspot (DSB frequency per meiosis) <sup>a</sup> | Expected double cutting frequency per meiosis | Deletion frequency per meiosis <sup>b</sup>                 | Expected double cutting frequency divided by deletion frequency |
|-----------------------------------|---------------|------------------------|----------------------------------------------------------------------------|-----------------------------------------------|-------------------------------------------------------------|-----------------------------------------------------------------|
| Chr1                              | Hotspot left  | 53                     | 0.03975                                                                    | 27.7 × 10 <sup>-4</sup>                       | 0.36 × 10 <sup>-4</sup>                                     | 77                                                              |
|                                   | Hotspot right | 93                     | 0.06975                                                                    |                                               |                                                             |                                                                 |
| Chr19                             | Hotspot left  | 41                     | 0.03075                                                                    | 15.9 × 10 <sup>-4</sup>                       | 0.17 × 10 <sup>-4</sup>                                     | 94                                                              |
|                                   | Hotspot right | 69                     | 0.05175                                                                    |                                               |                                                             |                                                                 |
| All 1–5 kb hotspot pairs (n=1023) |               | –                      | –                                                                          | 0.60115 <sup>c</sup>                          | 0.00801 (Chr1) <sup>d</sup><br>0.00645 (Chr19) <sup>d</sup> |                                                                 |

<sup>a</sup> DSB frequency was estimated from SPO11-oligo counts (RPMs) by equating 3000 DSBs in *Atm*<sup>-/-</sup> to one million reads. Note: we considered that there are about 300 DSBs per meiotic cell in wild type and an ~10-fold increase in *Atm*<sup>-/-</sup>.

<sup>b</sup> Deletion frequency calculated per meiotic genome.

<sup>c</sup> For each hotspot pair separated by 1–5 kb in *Atm*<sup>-/-</sup> on autosomes, the expected double cutting frequency per meiosis was calculated, and the frequencies were summed up.

<sup>d</sup> The total estimated deletion frequency per meiosis was calculated from the expected double cutting frequency at each hotspot pair relative to the double cutting and deletion frequency at Chr1 or Chr19 and summed up.

**Table S4. Recurring deletions at the Chr1 hotspot pair in B6 inbred and B6 × DBA F1 hybrid mice, Related to Figure 5B**

| Microhomology             | Microhomology length (bp) | No. deletions | Deletion (bp)           | Strain           |
|---------------------------|---------------------------|---------------|-------------------------|------------------|
| –                         | 0                         | 2             | 1416                    | B6               |
| CT                        | 2                         | 2             | 1868                    | B6, DBA/B6       |
| AGCC                      | 4                         | 2             | 1943                    | B6, DBA/B6       |
| ACCCT                     | 5                         | 2             | 2372                    | B6               |
| AGACA                     | 5                         | 2             | 2816                    | B6, DBA/B6       |
| CACTGC                    | 6                         | 2             | 2371                    | B6               |
| GGTTTAGA                  | 8                         | 8             | 2371                    | B6(6), DBA/B6(2) |
| AGCCAGTCA                 | 9                         | 2             | 1624                    | B6, DBA/B6       |
| Median 6 bp               |                           |               |                         |                  |
| Inverted microhomology    | Microhomology length (bp) | No. deletions | Deletion/Insertion (bp) | Strain           |
| CACTGCCCTGGA              | 12*                       | 2             | 2437/356                | B6               |
| 24 of total 185 deletions |                           |               |                         |                  |

\* A recurring deletion with inverted insertion with a 12-bp microhomology at one insert breakpoint; also see **Figure S6E**.

**Table S5. Insertions derived from other hotspots, Related to Figures 6 and S6**

| Hotspot pair | Insert origin | Insert start | Insert end | SPO11 activity at insert origin |                           | Insert length (bp) | Deletion length (bp) | Microhomology at insert breakpoints (left/right) |
|--------------|---------------|--------------|------------|---------------------------------|---------------------------|--------------------|----------------------|--------------------------------------------------|
|              |               |              |            | <i>Atm</i> <sup>-/-</sup>       | <i>Atm</i> <sup>+/+</sup> |                    |                      |                                                  |
| Chr1         | Chr3          | 116341240    | 116341350  | cluster                         | no                        | 111                | 2343                 | CAC/none                                         |
|              | Chr6          | 116019448    | 116019796  | hotspot                         | cluster                   | 349                | 2341                 | CACT/A                                           |
|              | Chr6          | 83540780     | 83540885   | hotspot                         | cluster                   | 106                | 1967                 | AG/none                                          |
|              | Chr7          | 41695870     | 41695945   | hotspot                         | hotspot                   | 76                 | 1596                 | GTA/none                                         |
|              | Chr8          | 87936133     | 87936219   | hotspot                         | hotspot                   | 87                 | 1513                 | (GATT insertion)/none                            |
|              | Chr9          | 56053260     | 56053364   | cluster                         | no                        | 105                | 1671                 | C/TG                                             |
|              | Chr12         | 91711551     | 91711567   | hotspot                         | hotspot                   | 17                 | 3326                 | CAAAGTGTCTG/TCT                                  |
| ChrX         | 69476686      | 69476920     | hotspot    | hotspot                         | 235                       | 2108               | AT/none              |                                                  |
| Chr1 B/D     | Chr9          | 55392465     | 55392589   | no                              | cluster                   | 125                | 2399                 | C/A                                              |
| Chr19        | Chr16         | 35066202     | 35066440   | hotspot                         | hotspot                   | 239                | 2005                 | none/none                                        |
|              | Chr17         | 78359789     | 78359826   | hotspot                         | hotspot                   | 38                 | 2307                 | CA/none                                          |
|              | Chr17         | 80408805     | 80408819   | hotspot pair                    | hotspot pair              | 15                 | 1995                 | T/CAT                                            |

| Hotspot pair | Insert from the non-PAR ChrY   | Insert start                  | Insert end | SPO11 activity at insert origin |                           | Insert length (bp) | Deletion length (bp) | Microhomology at insert breakpoints (left/right) |           |
|--------------|--------------------------------|-------------------------------|------------|---------------------------------|---------------------------|--------------------|----------------------|--------------------------------------------------|-----------|
|              |                                |                               |            | <i>Atm</i> <sup>-/-</sup>       | <i>Atm</i> <sup>+/+</sup> |                    |                      |                                                  |           |
| Chr1         | insert 1*<br>(2 of 26 repeats) | 28785715                      | 28785921   | hotspot                         | hotspot                   | 207                | 2253                 | A/G                                              |           |
|              |                                | 58748224                      | 58748430   | cluster                         | hotspot                   |                    |                      |                                                  |           |
|              |                                | 90475833                      | 90476039   | no                              | hotspot**                 |                    |                      |                                                  |           |
|              | insert 2*<br>(1 of 15 repeats) | 90476619                      | 90476713   | no                              | hotspot**                 | 95                 | 1939                 | AAACA/G                                          |           |
|              |                                | insert 3<br>(3 of 26 repeats) | 5658645    | 5658703                         | hotspot                   | cluster            | 59                   | 1500                                             | none/none |
|              |                                |                               | 5944098    | 5944156                         | hotspot                   | cluster            |                      |                                                  |           |

\* Inserts 1 and 2 are part of the same repeat; both match 12 copies of the repeat.

\*\* Same hotspot.

|       |                  |          |          |                                           |  |     |      |                        |
|-------|------------------|----------|----------|-------------------------------------------|--|-----|------|------------------------|
| Chr19 | Insert from Chr1 | 88533343 | 88533493 | microsatellite repeat (CTT) <sub>27</sub> |  | 148 | 2643 | ACTGAGCTATCT/CCTCCTCCT |
|-------|------------------|----------|----------|-------------------------------------------|--|-----|------|------------------------|

**Table S6. Insertions derived from the hotspot pair, Related to Figures 6 and S6**

| Hotspot pair | Hotspot left or right | Insert length (bp) | Deletion length (bp) | Distance between deletion and insertion breakpoints (bp) | Microhomology at insert breakpoints (left/right) |
|--------------|-----------------------|--------------------|----------------------|----------------------------------------------------------|--------------------------------------------------|
| Chr1         | left                  | 709                | 2590                 | 4                                                        | none/GAAGG                                       |
|              | left                  | 22                 | 2411                 | 28                                                       | none/AGA                                         |
|              | right                 | 343                | 2334                 | 11                                                       | TCCAGGGCAGTGC/none                               |
|              | right                 | 356                | 2437                 | 0                                                        | TCCAGGGCAGTG/none                                |
|              | right                 | 356                | 2437                 | 0                                                        | TCCAGGGCAGTG/none                                |
| Chr1 B/D     | left                  | 493                | 2025                 | 40                                                       | TTG/AAAG                                         |
|              | right                 | 302                | 2465                 | 56                                                       | TCCAGGGCAGT/ATTC                                 |
|              | right                 | 216                | 2399                 | 3                                                        | GT/T                                             |
| Chr19        | left                  | 204                | 2591                 | 0                                                        | none/C                                           |
|              | right                 | 231                | 2591                 | 3                                                        | CTCTCTC/none                                     |
|              | left                  | 130                | 1361                 | 0                                                        | none/ATAGCT                                      |
|              | left                  | 132                | 1949                 | 0                                                        | none/TAGCT                                       |
|              | right                 | 16                 | 2063                 | 44                                                       | GCTCT/A                                          |

**Table S7. Frequency of microdeletions in individual amplicons, Related to Figure 7**

| Genotype                    | Amplicon     | No. reads       | No. reads with deletions (unique <sup>a</sup> ) | Frequency (adjusted <sup>b</sup> ) (10 <sup>-5</sup> ) | P value <sup>c</sup> versus <i>Atm</i> <sup>-/-</sup> (adjusted <sup>b</sup> ) | P value <sup>c</sup> <i>Spo11</i> <sup>-/-</sup> (adjusted <sup>b</sup> ) |
|-----------------------------|--------------|-----------------|-------------------------------------------------|--------------------------------------------------------|--------------------------------------------------------------------------------|---------------------------------------------------------------------------|
| <i>Atm</i> <sup>-/-</sup>   | 1            | 3611491         | 60 (36)                                         | 1.66                                                   |                                                                                |                                                                           |
|                             | 2            | 3072566         | 65 (39)                                         | 2.12                                                   |                                                                                |                                                                           |
|                             | 3            | 3714378         | 50 (43)                                         | 1.35                                                   |                                                                                |                                                                           |
|                             | 4            | 3240515         | 41 (31)                                         | 1.27                                                   |                                                                                |                                                                           |
|                             | <b>Total</b> | <b>13638950</b> | <b>216 (149)</b>                                | <b>1.58</b>                                            |                                                                                |                                                                           |
| <i>Atm</i> <sup>+/-</sup>   | 1            | 3615027         | 9 (7)                                           | 0.25                                                   | <0.0001                                                                        | 0.0161                                                                    |
|                             | 2            | 4036817         | 4 (4)                                           | 0.10                                                   | <0.0001                                                                        | 0.0825                                                                    |
|                             | 3            | 5334246         | 17 (16)                                         | 0.32                                                   | <0.0001                                                                        | 0.0592                                                                    |
|                             | 4            | 4704066         | 10 (10)                                         | 0.21                                                   | <0.0001                                                                        | 0.2799                                                                    |
|                             | <b>Total</b> | <b>17690156</b> | <b>40 (37)</b>                                  | <b>0.23</b>                                            | <b>&lt;0.0001</b>                                                              | <b>0.4670</b>                                                             |
| <i>Atm</i> <sup>+/+</sup>   | 1            | 5099332         | 23 (8)                                          | 0.45 (0.20)                                            | <0.0001 (<0.0001)                                                              | 0.0004 (0.0387)                                                           |
|                             | 2            | 4402709         | 53 (12)                                         | 1.20 (0.73)                                            | 0.002 (<0.0001)                                                                | <0.0001 (0.0104)                                                          |
|                             | 3            | 3360847         | 6 (4)                                           | 0.18                                                   | <0.0001                                                                        | 0.6158                                                                    |
|                             | 4            | 3253036         | 5 (4)                                           | 0.15                                                   | <0.0001                                                                        | 0.1313                                                                    |
|                             | <b>Total</b> | <b>16115924</b> | <b>87 (28)</b>                                  | <b>0.54 (0.33)</b>                                     | <b>&lt;0.0001 (&lt;0.0001)</b>                                                 | <b>&lt;0.0001 (0.0173)</b>                                                |
| <i>Spo11</i> <sup>-/-</sup> | 1            | 3339211         | 1 (1)                                           | 0.03                                                   | <0.0001                                                                        |                                                                           |
|                             | 2            | 2915459         | 8 (7)                                           | 0.27                                                   | <0.0001                                                                        |                                                                           |
|                             | 3            | 4485773         | 6 (6)                                           | 0.13                                                   | <0.0001                                                                        |                                                                           |
|                             | 4            | 3568282         | 12 (9)                                          | 0.34                                                   | <0.0001                                                                        |                                                                           |
|                             | <b>Total</b> | <b>14308725</b> | <b>27 (23)</b>                                  | <b>0.19</b>                                            | <b>&lt;0.0001</b>                                                              |                                                                           |

<sup>a</sup> Total unique deletions obtained in that amplicon; note that the same deletion can be obtained independently in the overlapping amplicon.

<sup>b</sup> Adjusted frequencies and P values take into account potential jackpot events, in which 14 reads were obtained for the same microdeletion in amplicon 1, and 22 for another microdeletion in amplicon 2. Because these microdeletions were not obtained or were obtained just once in other amplicons they are considered to have arisen from PCR overamplification.

<sup>c</sup> Chi-square test.
