# Supplementary material
Source: PubMed Central journal article supplement (PMC8616837)

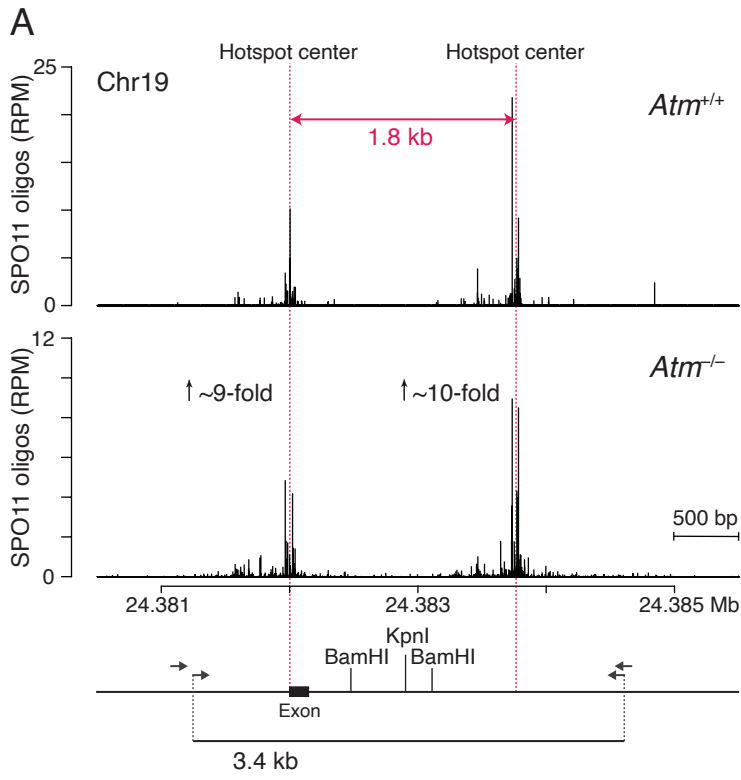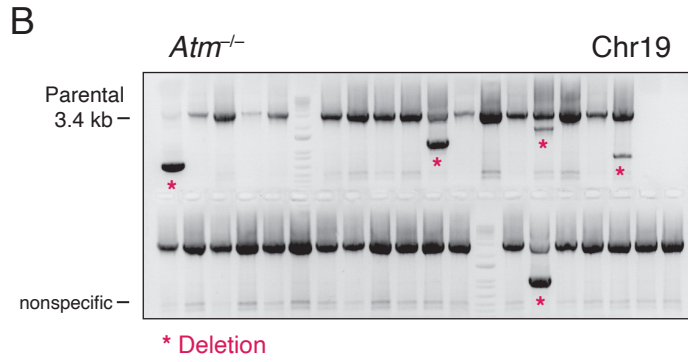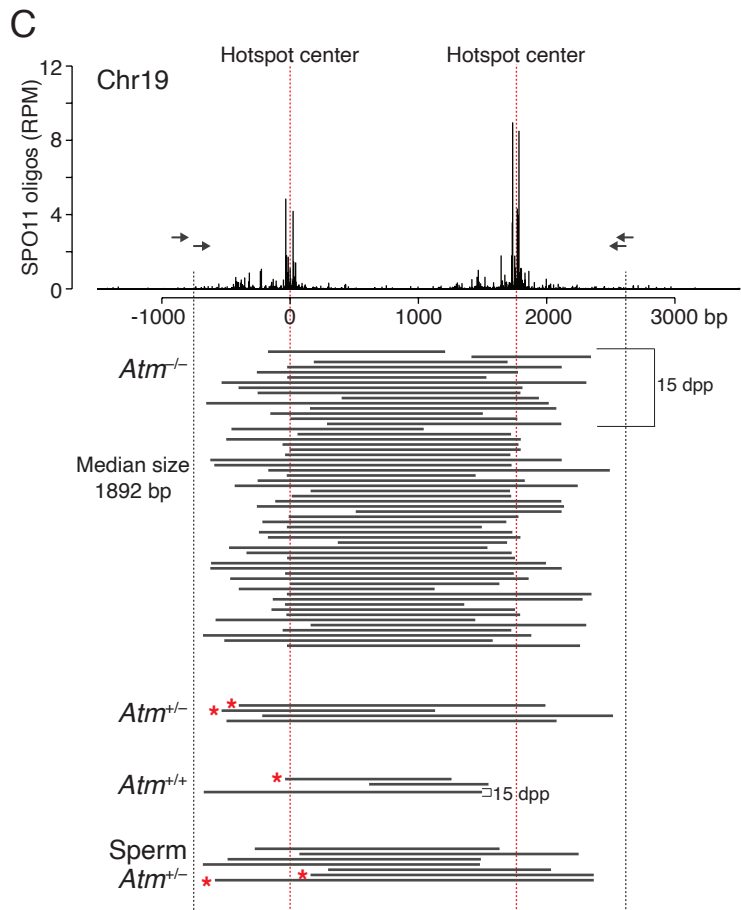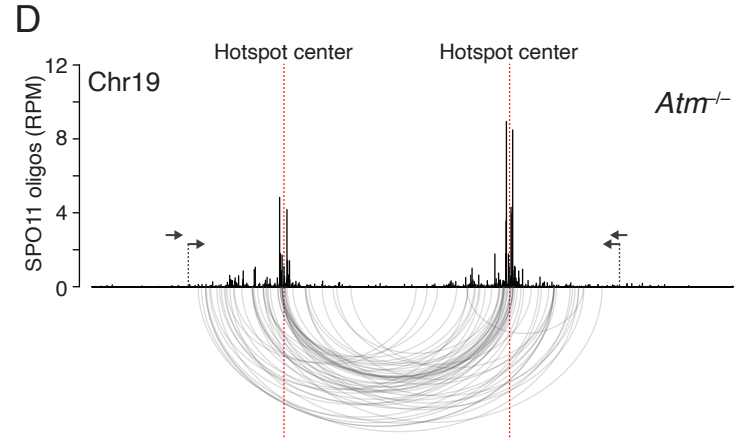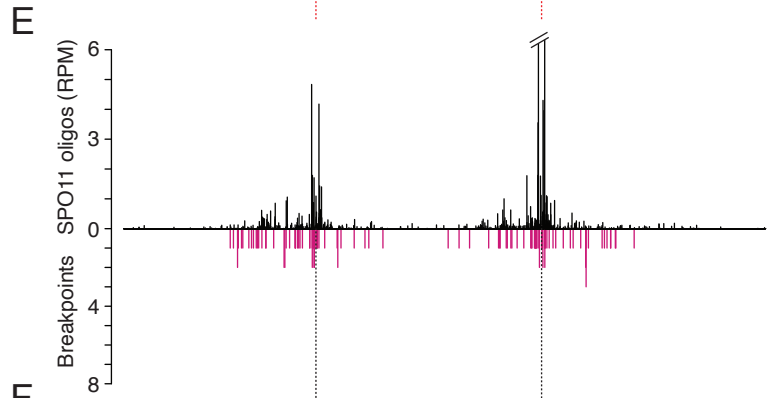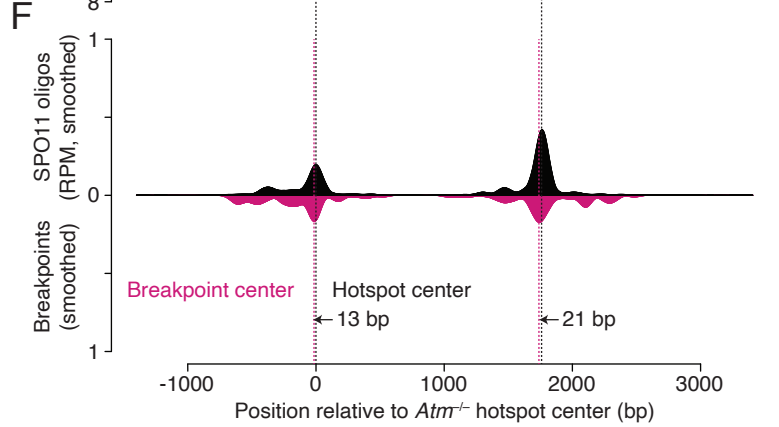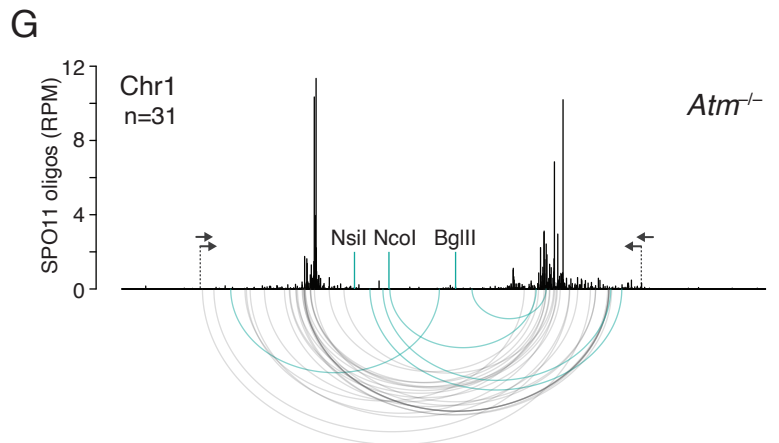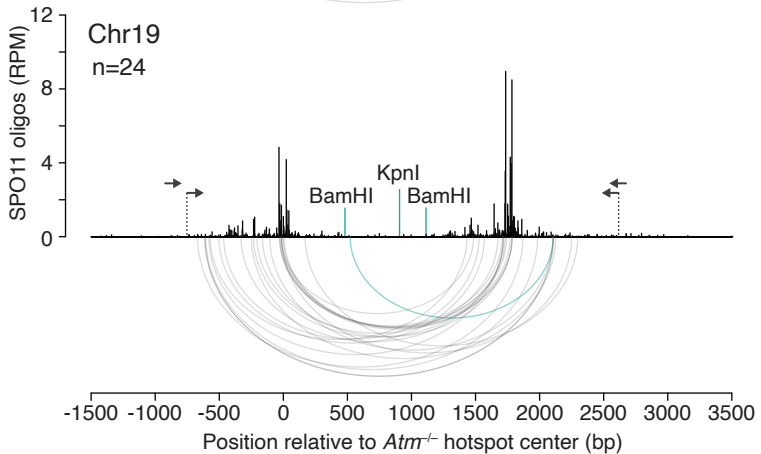

Supplement: NIHMS1753343-supplement-FigS2.pdf [file NIHMS1753343-supplement-FigS2.pdf]

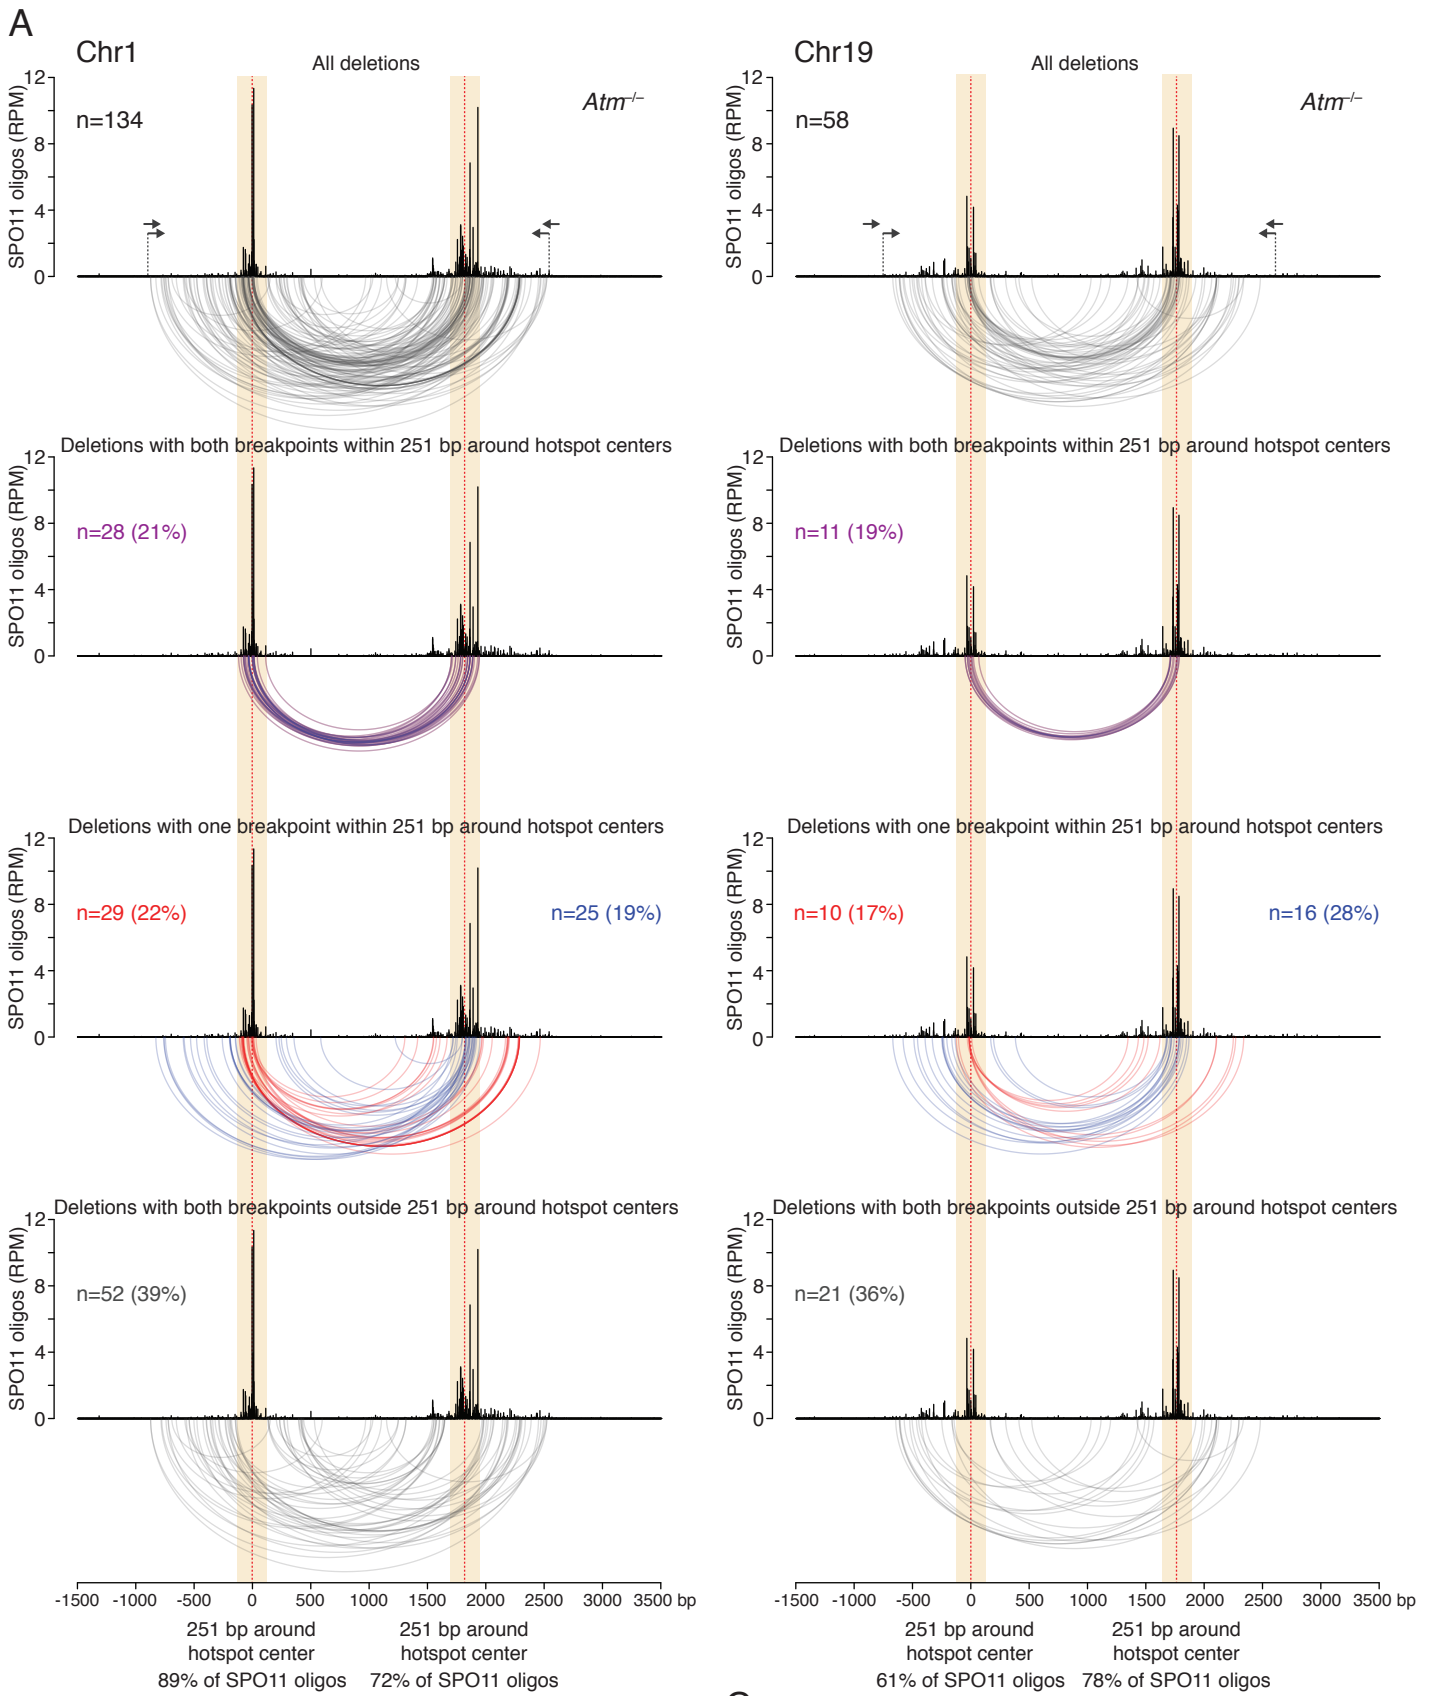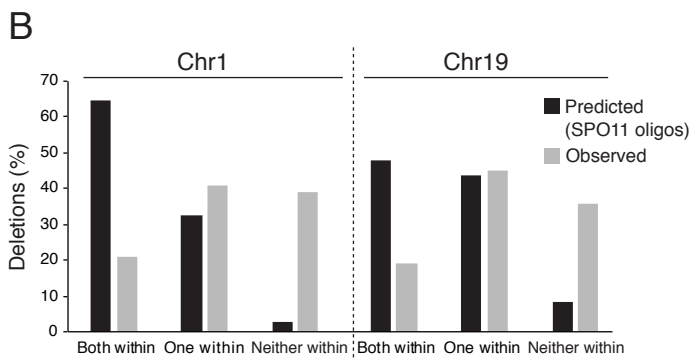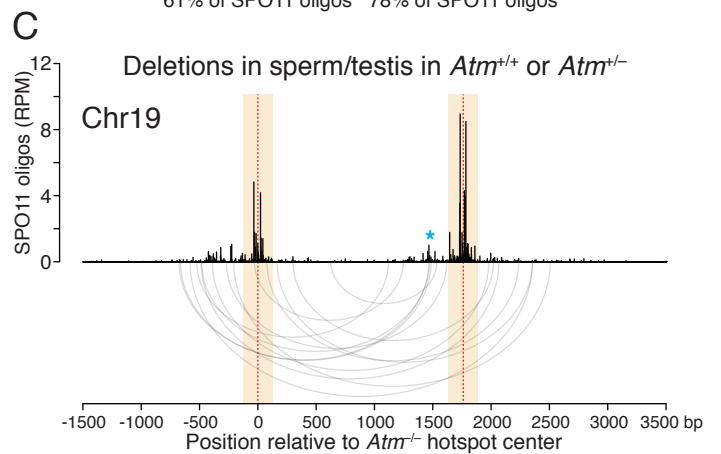

Supplement: NIHMS1753343-supplement-FigS3.pdf [file NIHMS1753343-supplement-FigS3.pdf]

**A**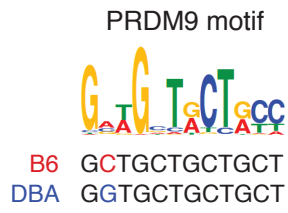**B**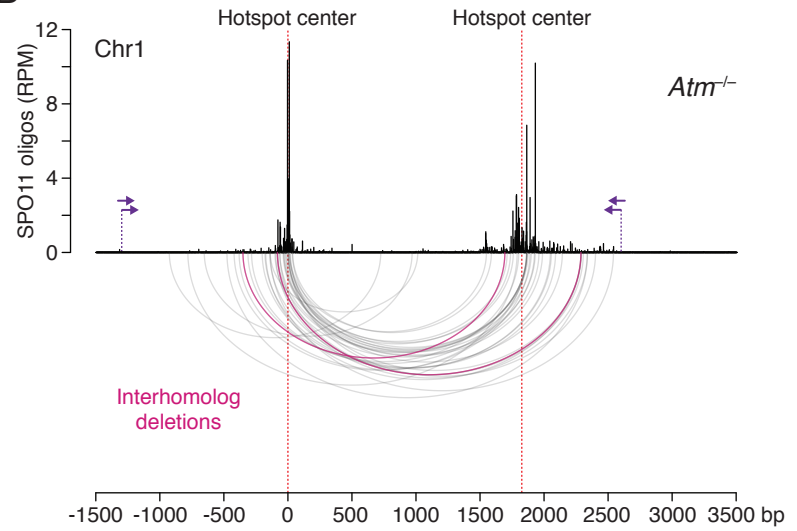**C**

### Attempted double-strand gap repair

DBA-B6-Δ-DBA

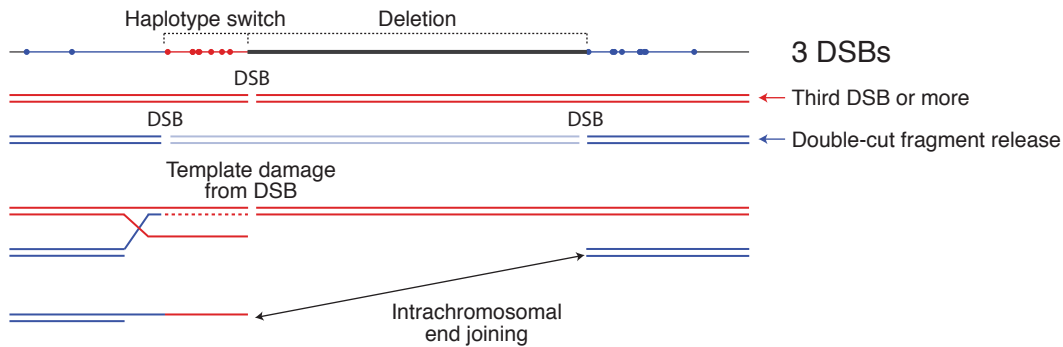

DBA-B6-Δ-B6

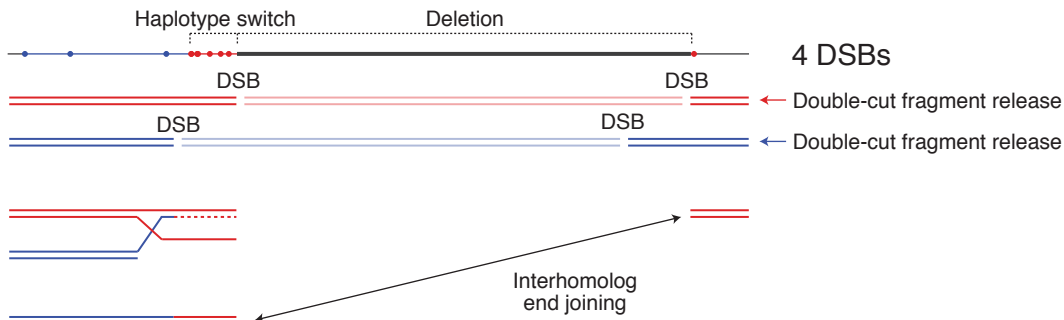**D**

### Precise insertion

DBA-B6-Δ-DBA

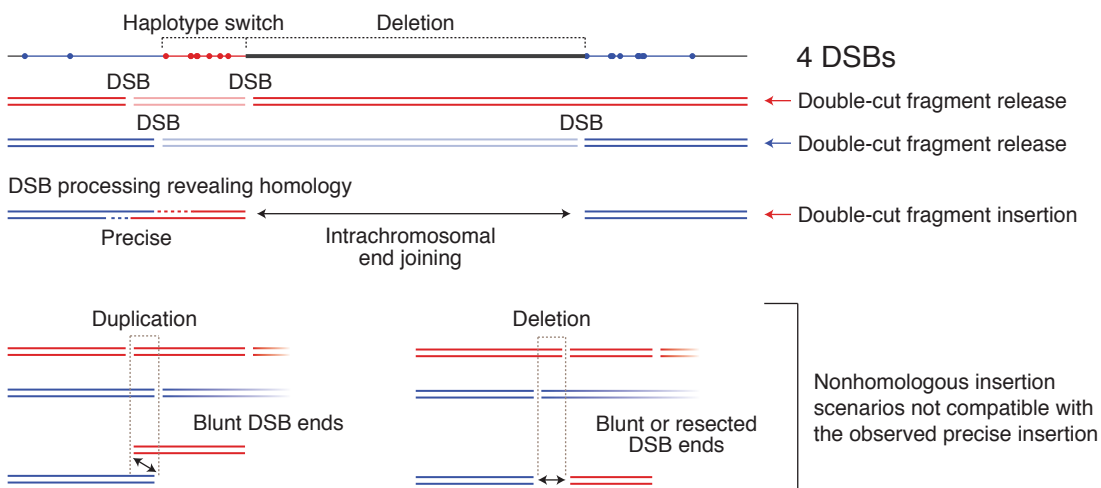

Supplement: NIHMS1753343-supplement-FigS5.pdf [file NIHMS1753343-supplement-FigS5.pdf]

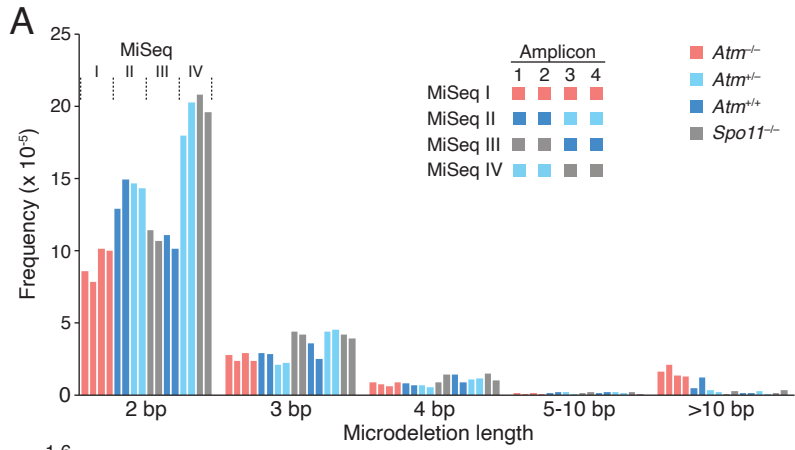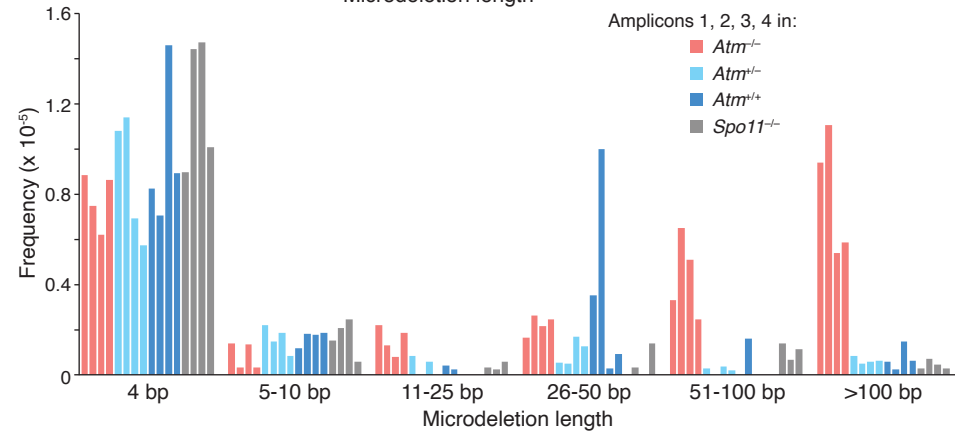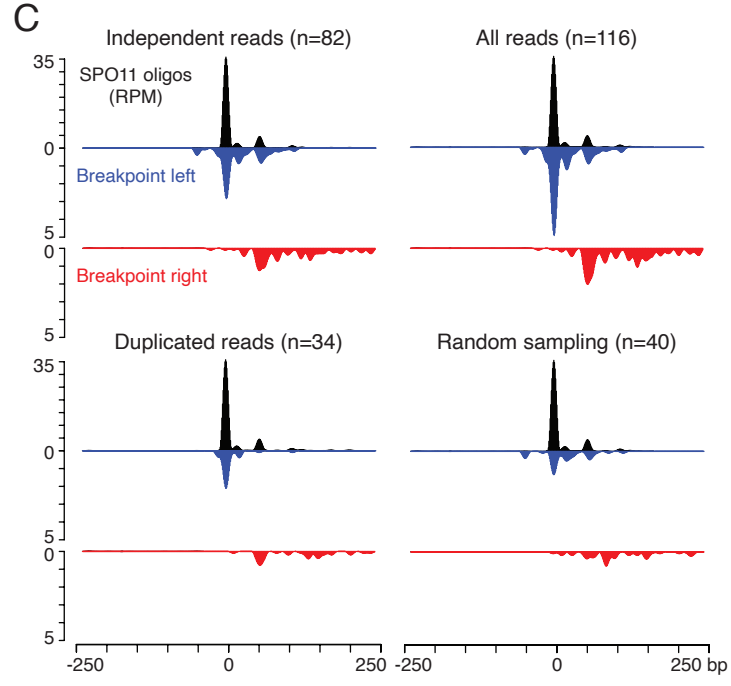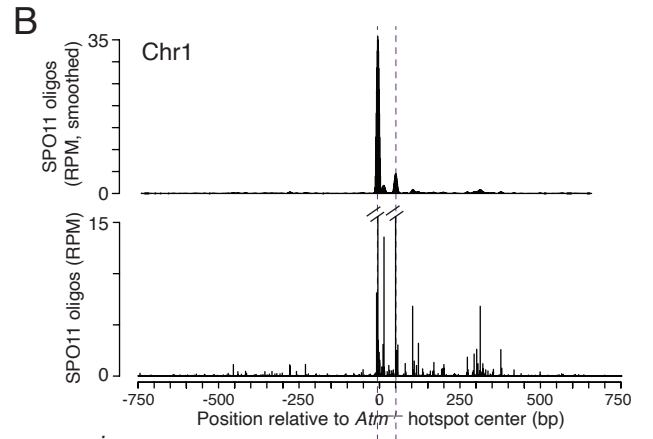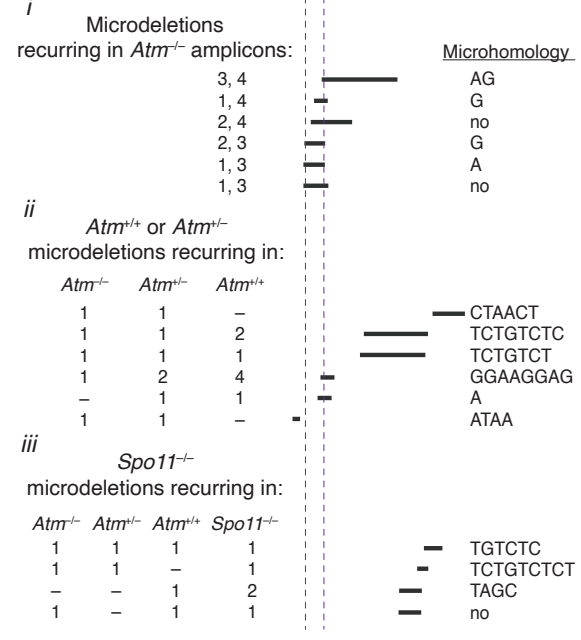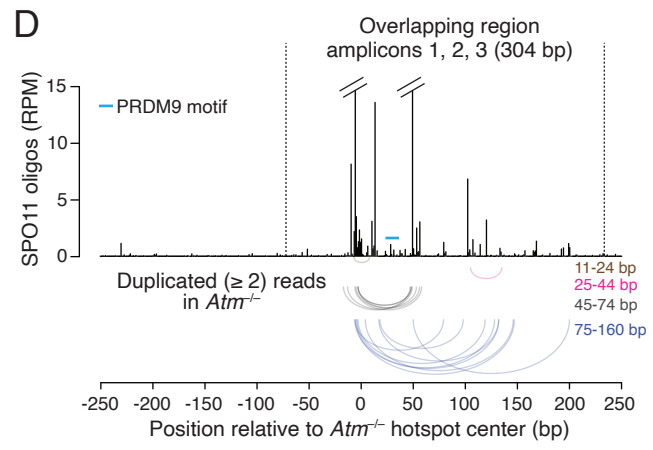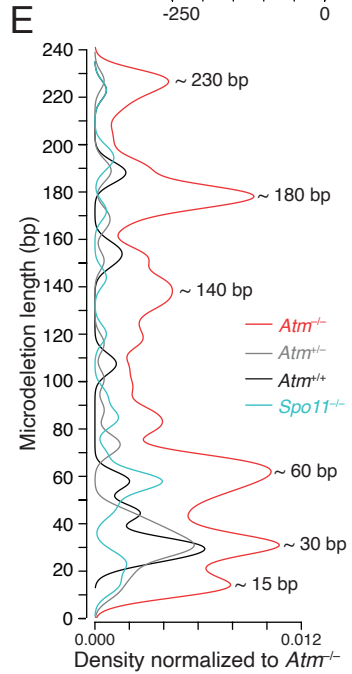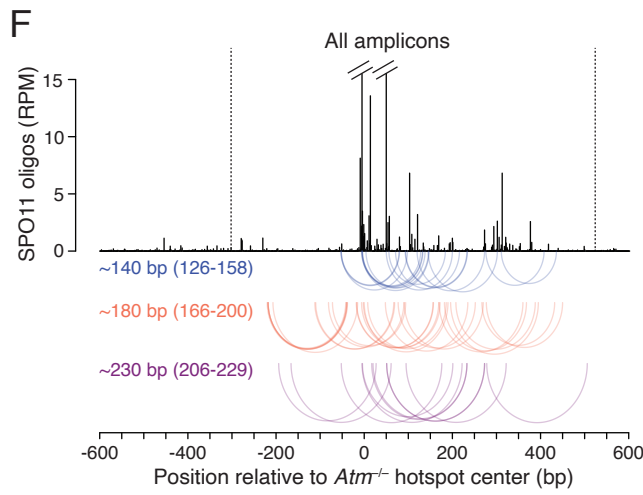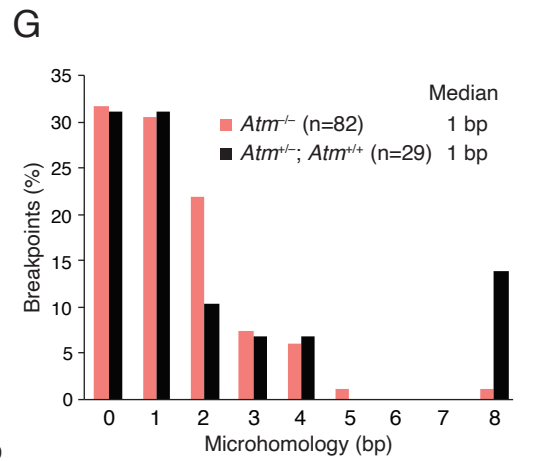

Supplement: NIHMS1753343-supplement-FigS7.pdf [file NIHMS1753343-supplement-FigS7.pdf]
